# Supplementary material for: Association of Diabetes Severity and Mortality with Lung Squamous Cell Carcinoma
Source: MDPI journal article supplement (doi:10.3390/cancers14102553), 2022-05-22
Supplement: s1 [file s1]

**Supplemental Table S1.** Adapted Diabetes Complications Severity Index

|                             | No abnormality = 0 | Some abnormality = 1 | Severe abnormality=2 |
|-----------------------------|--------------------|----------------------|----------------------|
| Retinopathy                 | 0                  | 1                    | 2                    |
| Nephropathy                 | 0                  | 1                    | 2                    |
| Neuropathy                  | 0                  | 1                    |                      |
| Cerebrovascular             | 0                  | 1                    | 2                    |
| Cardiovascular              | 0                  | 1                    | 2                    |
| Peripheral vascular disease | 0                  | 1                    | 2                    |
| Metabolic                   | 0                  | 1                    | 2                    |

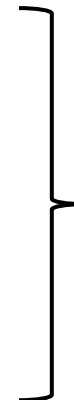

**aDCSI scores range 0-13**
